# Supplementary material for: Sn-doped thioantimonate superionic conductors with high air stability and enhanced Li-ion conduction for all-solid-state lithium batteries
Source: Royal Society of Chemistry journal article supplement (doi:10.1039/d3ta04730j), 2023-01-01
Supplement: d3ta04730j1.pdf [file d3ta04730j1.pdf]

## Electronic Supplementary Information

### **Sn-doped thioantimonate superionic conductors with high air stability and enhanced Li-ion conduction for all-solid-state lithium batteries**

Zhihui Ma<sup>a</sup>, Jie Shi<sup>a</sup>, Di Wu<sup>a</sup>, Dishuang Chen<sup>a</sup>, Shuai Shang<sup>a</sup>, Xuanhui Qu<sup>a</sup>, Ping Li<sup>\*ab</sup>

<sup>a</sup> *Beijing Advanced Innovation Center for Materials Genome Engineering, Institute for Advanced Materials and Technology, University of Science and Technology Beijing, Beijing 100083, PR China*

<sup>b</sup> *Shanxi Beike Qiantong Energy Storage Science and Technology Research Institute Co. Ltd., Gaoping 048400, PR China*

\* Corresponding author.

E-mail address: ustbliping@126.com.

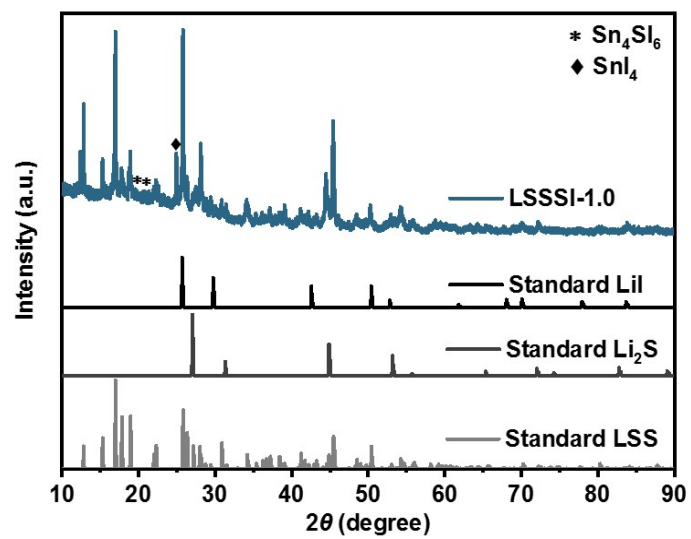

**Fig. S1.** XRD pattern of the synthesized LSSSI-1.0 material.

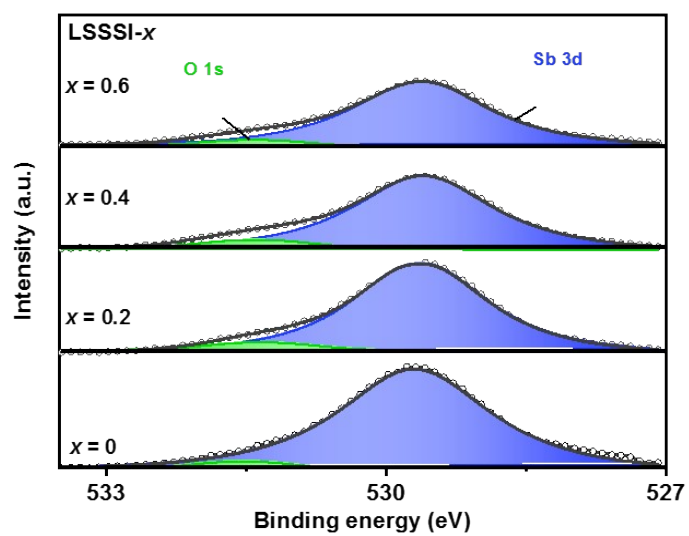

**Fig. S2.** Sb 3d XPS spectra for LSSSI- $x$  ( $0.0 \leq x \leq 0.6$ ) electrolytes. The minor peak at 531.6 eV (green) is attributed to antimony oxide caused by surface contaminations.<sup>1-3</sup>

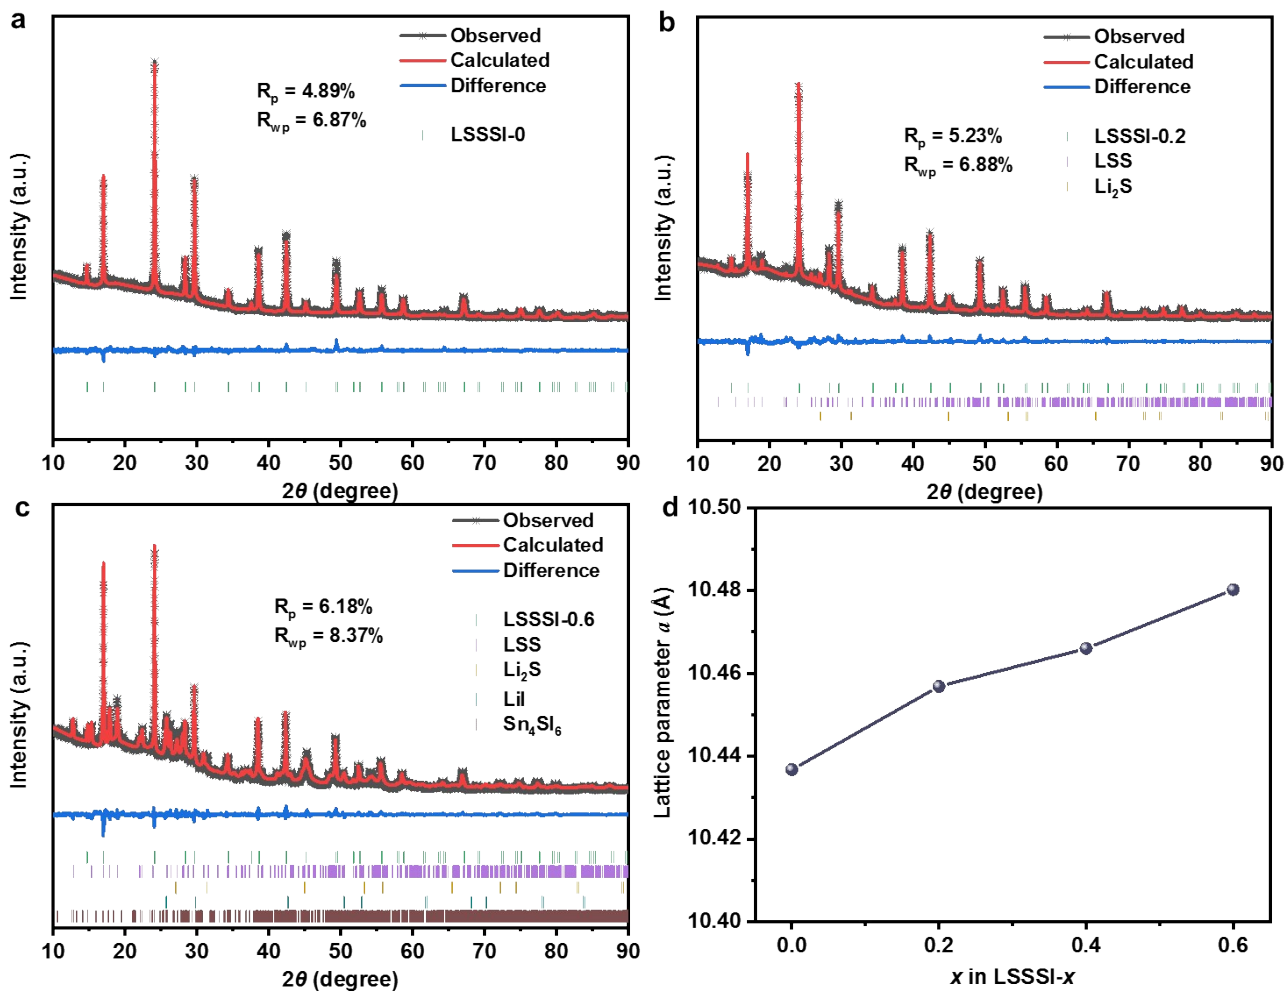

**Fig. S3.** Rietveld refinements of (a) LSSSI-0, (b) LSSSI-0.2 and (c) LSSSI-0.6 materials. (d)

Compositional dependence of the lattice parameter for LSSSI- $x$ .

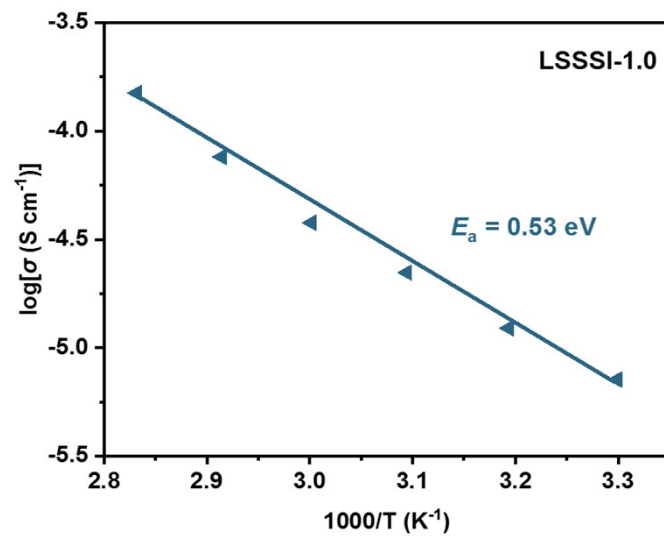

**Fig. S4.** Arrhenius profile of LSSSI-1.0 electrolyte.

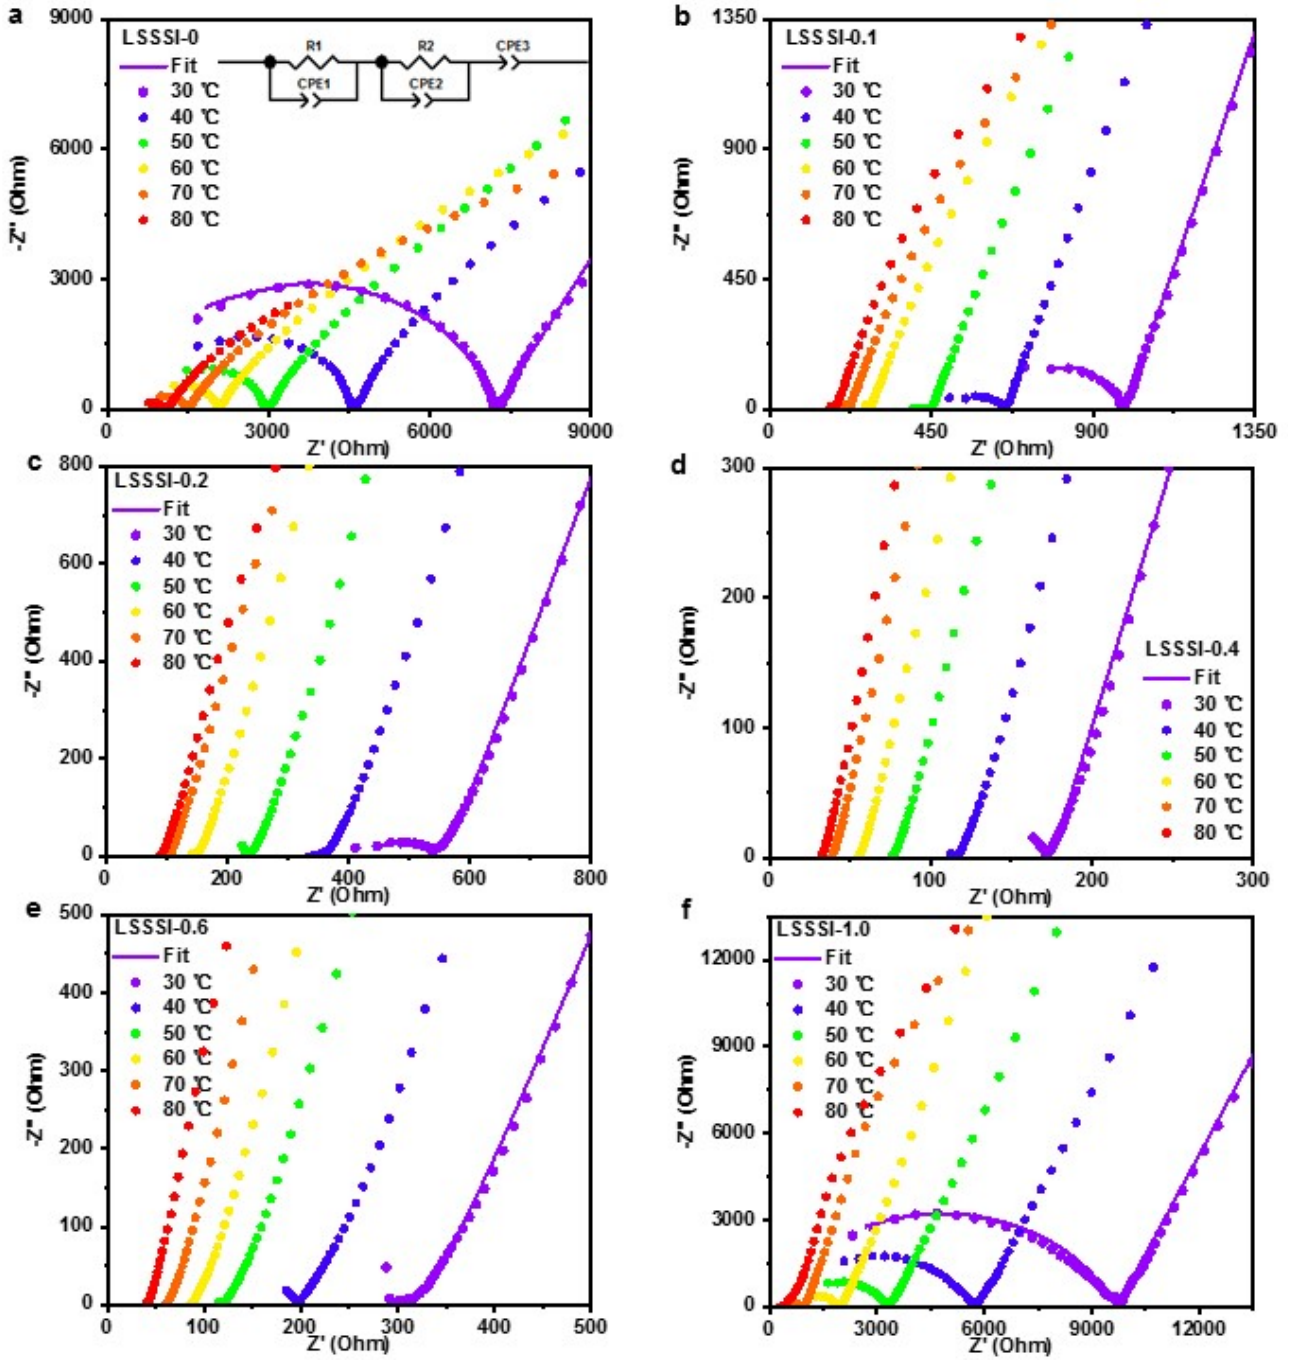

**Fig. S5.** Impedance spectra of LSSSI- $x$  ( $0.0 \leq x \leq 1.0$ ) electrolytes at different temperatures from 30 to 80 °C, the inset is the corresponding equivalent circuit.

The ionic conductivity can be obtained as follows,<sup>4</sup>

$$\sigma = \frac{R}{LS} \quad (1)$$

where  $\sigma$  is the ionic conductivity,  $R$  is the total resistance of SSEs,  $L$  is the sample thickness,  $S$  is the area of the sample.

The activation energy is calculated by<sup>5</sup>

$$\sigma = A \exp\left(\frac{E_a}{RT}\right) \quad (2)$$

where  $A$  is the pre-exponential factor,  $E_a$  is the activation energy,  $R$  is the gas constant,  $T$  is the absolute temperature.

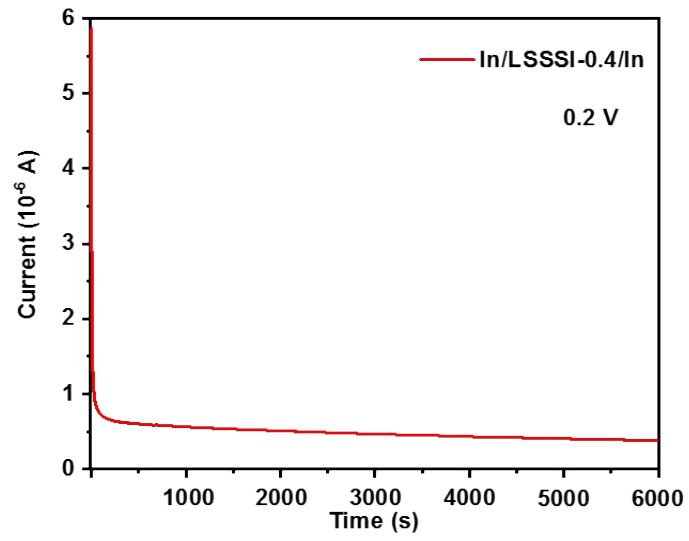

**Fig. S6.** DC polarization profiles of ion-blocking In/LSSSI-0.4/In cell at 0.2 V.



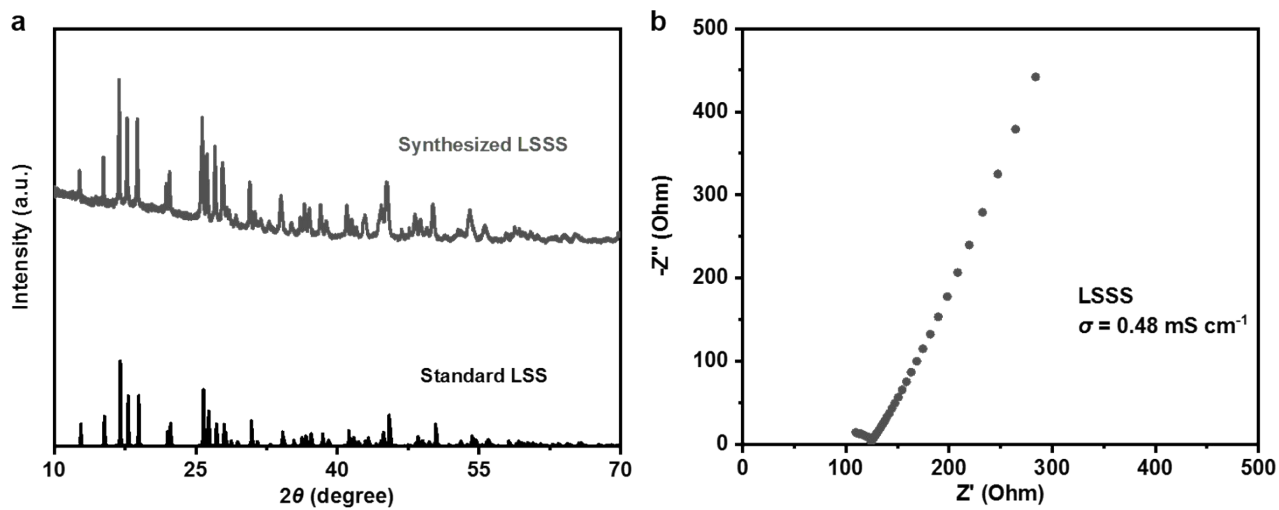

**Fig. S7.** (a) XRD pattern of prepared LSSS electrolyte. (b) Nyquist plot for LSSS electrolyte at 30 °C.

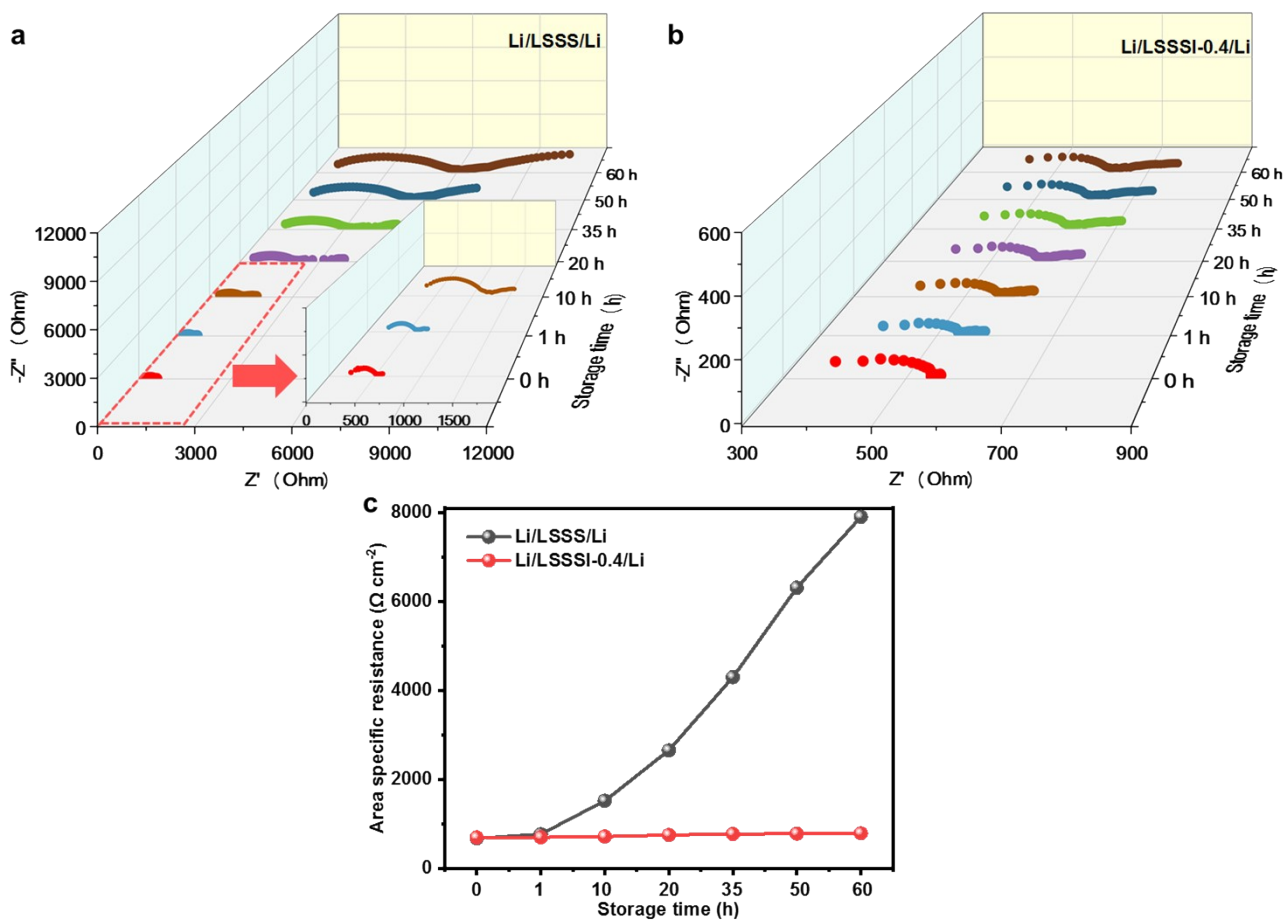

**Fig. S8.** Storage time dependence of EIS spectra at room temperature for (a) LSSS and (b) LSSSI-0.4, respectively. (c) The area specific resistance of Li/LSSS/Li and Li/LSSSI-0.4/Li cells as a function of storage time.

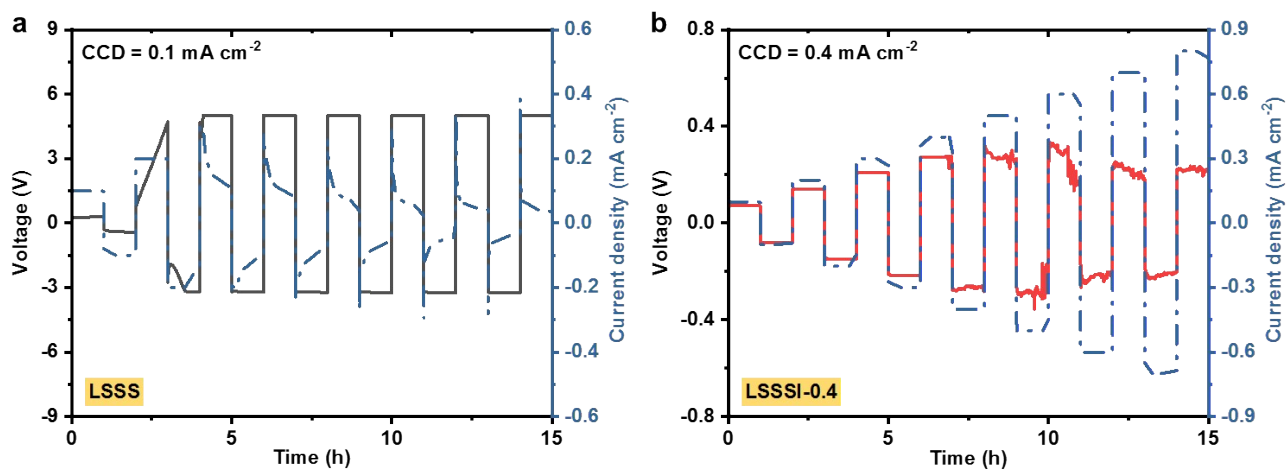

**Fig. S9.** Galvanostatic cycling of the Li symmetric cell at step-increased current densities of (a) Li/LSSS/Li and (b) Li/LSSSI-0.4/Li symmetric cells.

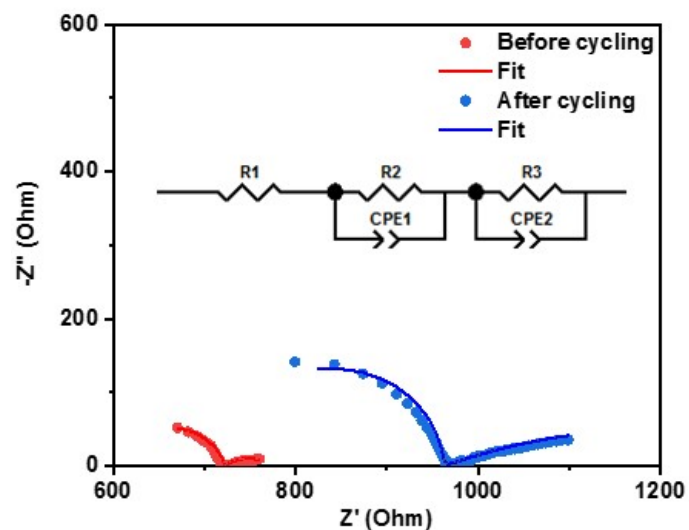

**Fig. S10.** The interfacial resistances of the Li/LSSSI-0.4/Li symmetric cell before and after cycling for 450 h, the inset is the corresponding equivalent circuit.

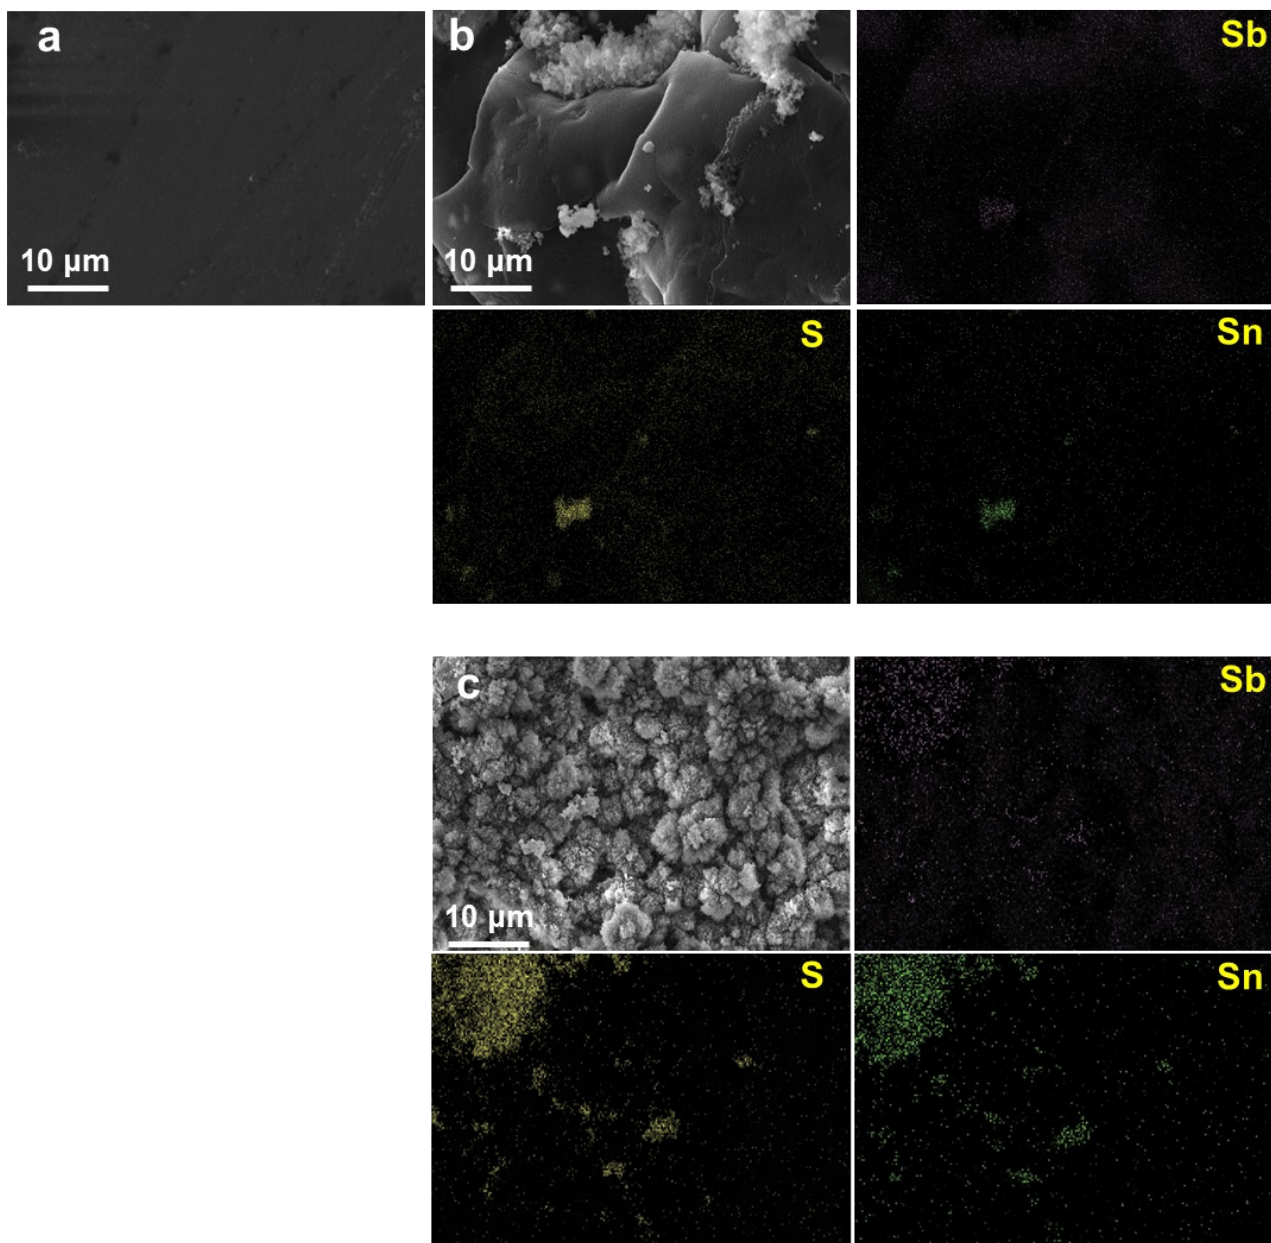

**Fig. S11.** (a) The morphology of the pristine Li metal. SEM images and corresponding EDS element mappings of the Li surface (b) after storage of 60 h in the Li/LSSS/Li cell and (c) after cycling at a current density of  $0.1 \text{ mA cm}^{-2}$  for 36 h.

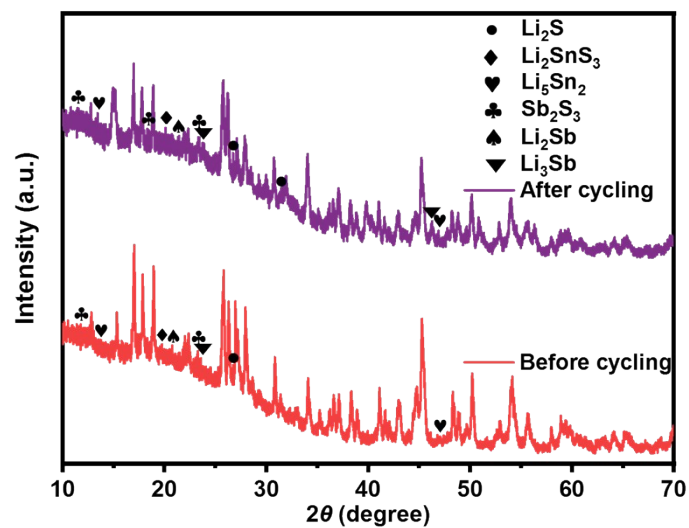

**Fig. S12.** XRD patterns of the interfacial compositions at Li/SSEs interfaces after 60 h of storage and 36 h cycling in the Li/LSSS/Li symmetric cell.

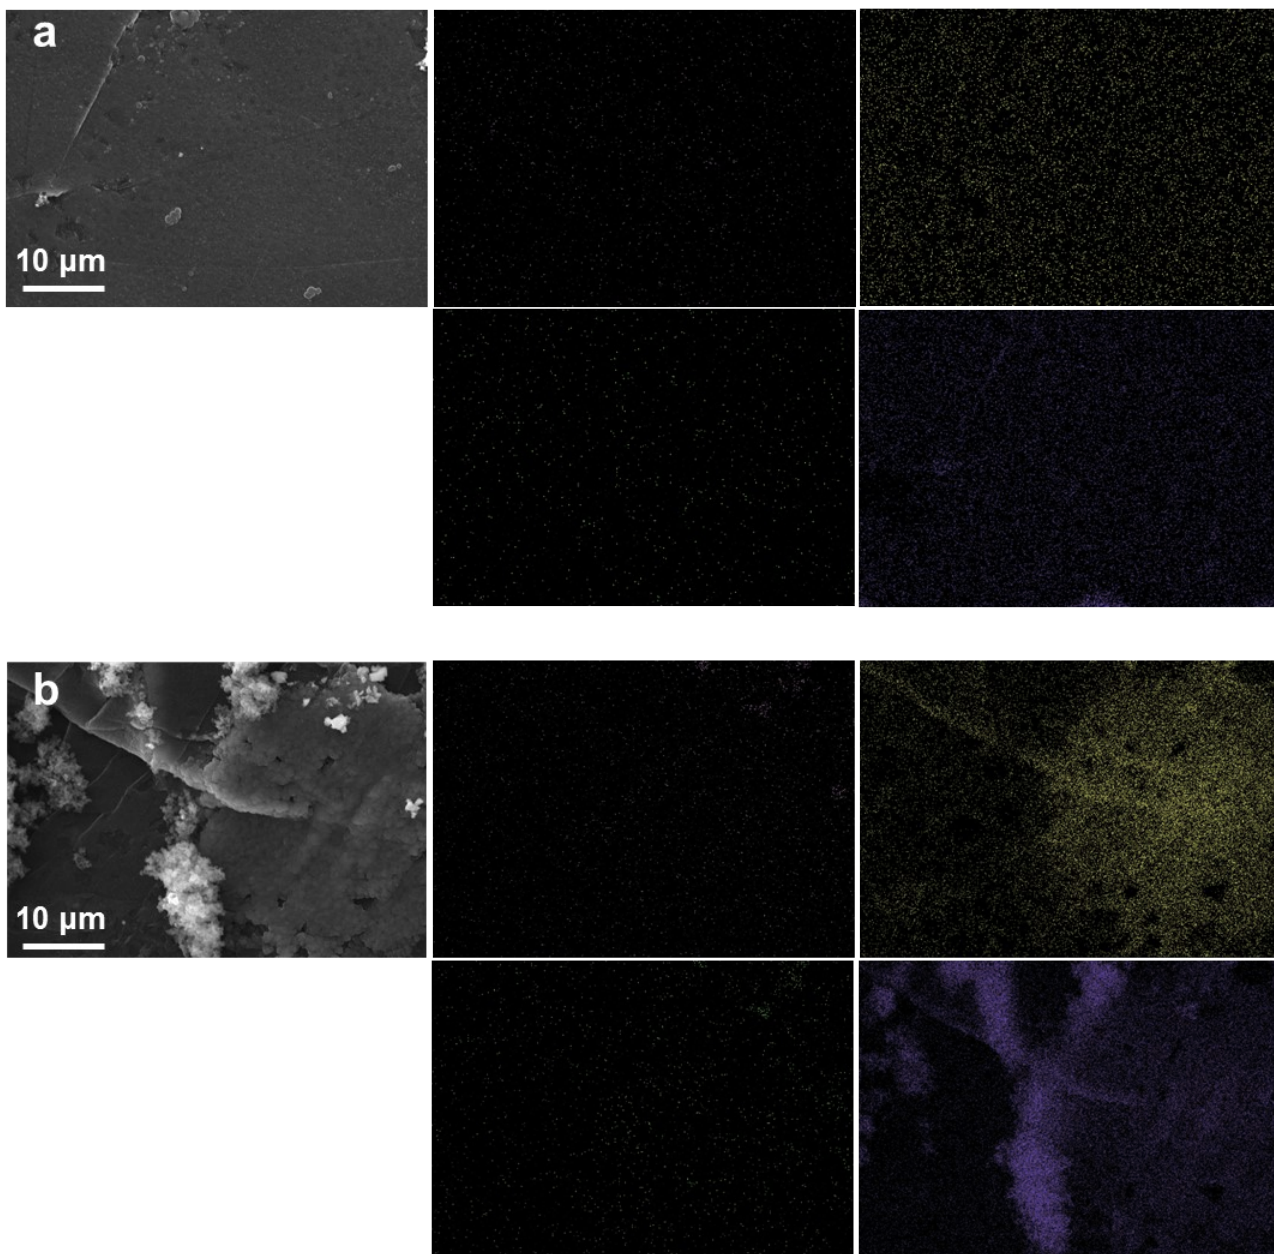

**Fig. S13.** SEM images and corresponding EDS element mappings of the Li surface (a) after storage of 60 h in the Li/LSSSI-0.4/Li cell and (b) after cycling at a current density of  $0.1 \text{ mA cm}^{-2}$  for 36 h.

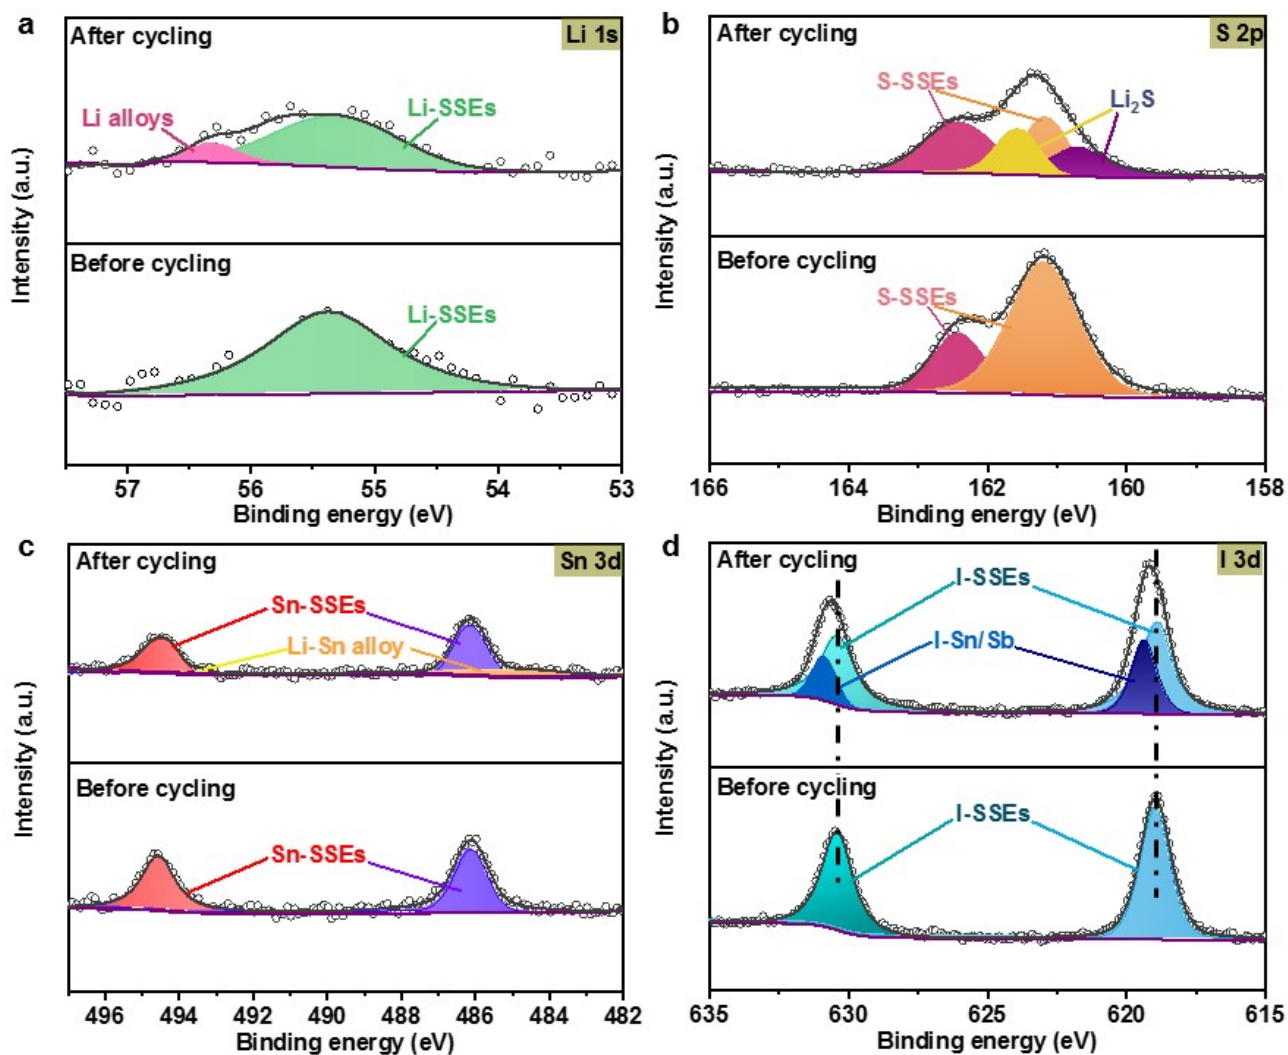

**Fig. S14.** (a) Li 1s, (b) S 2p, (c) Sn 3d and (d) I 3d XPS spectra of the interfacial compositions at Li/SSEs interface before and after cycling.



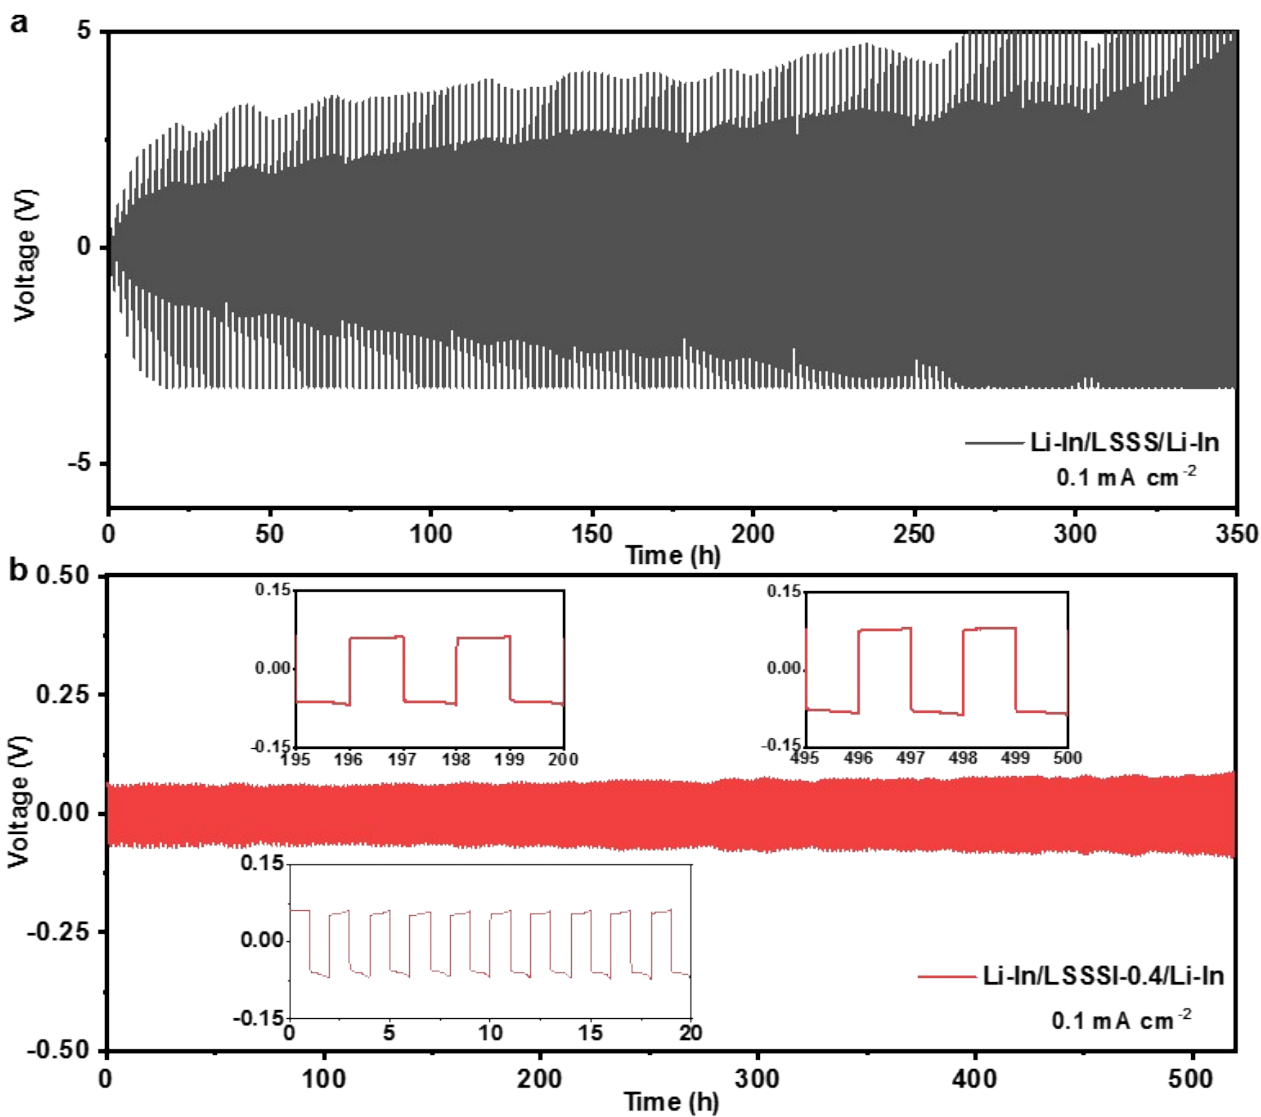

**Fig. S15.** Voltage profiles as a function of time during galvanostatic Li plating/stripping for (a) Li-In/LSSS/Li-In symmetric cell and (b) Li/LSSSI-0/Li symmetric cell at a current density of  $0.1 \text{ mA cm}^{-2}$ .

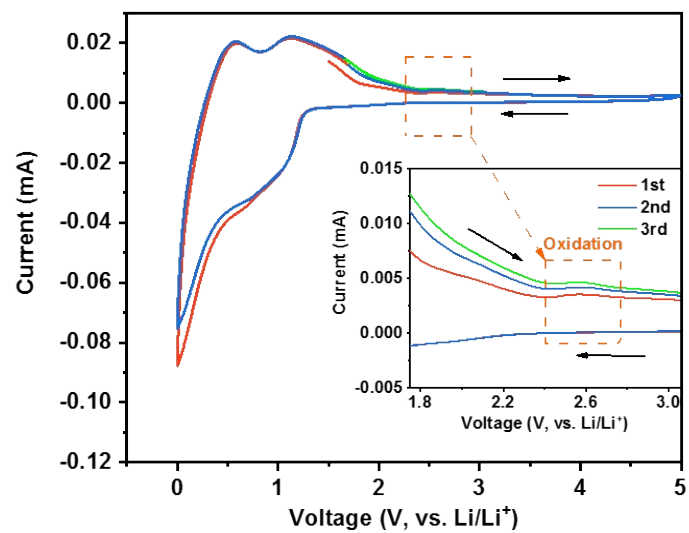

**Fig. S16.** The Cyclic Voltammetry of LSSSI-0.4 from 0 to 5 V vs. Li/Li<sup>+</sup>.

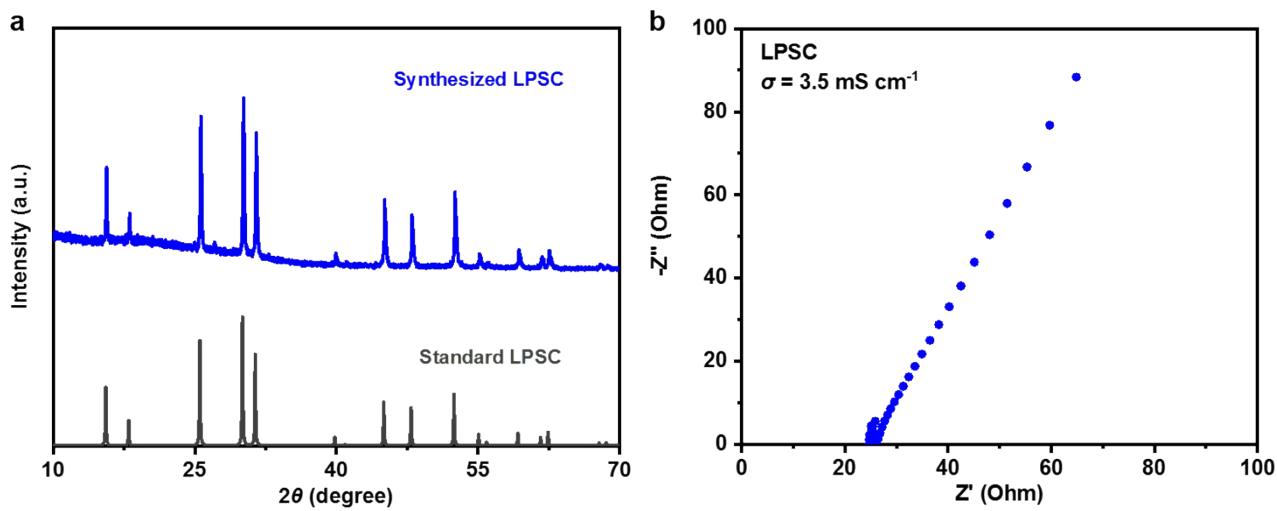

**Fig. S17.** (a) XRD pattern and (b) Nyquist plot of prepared LPSC electrolyte at room temperature.

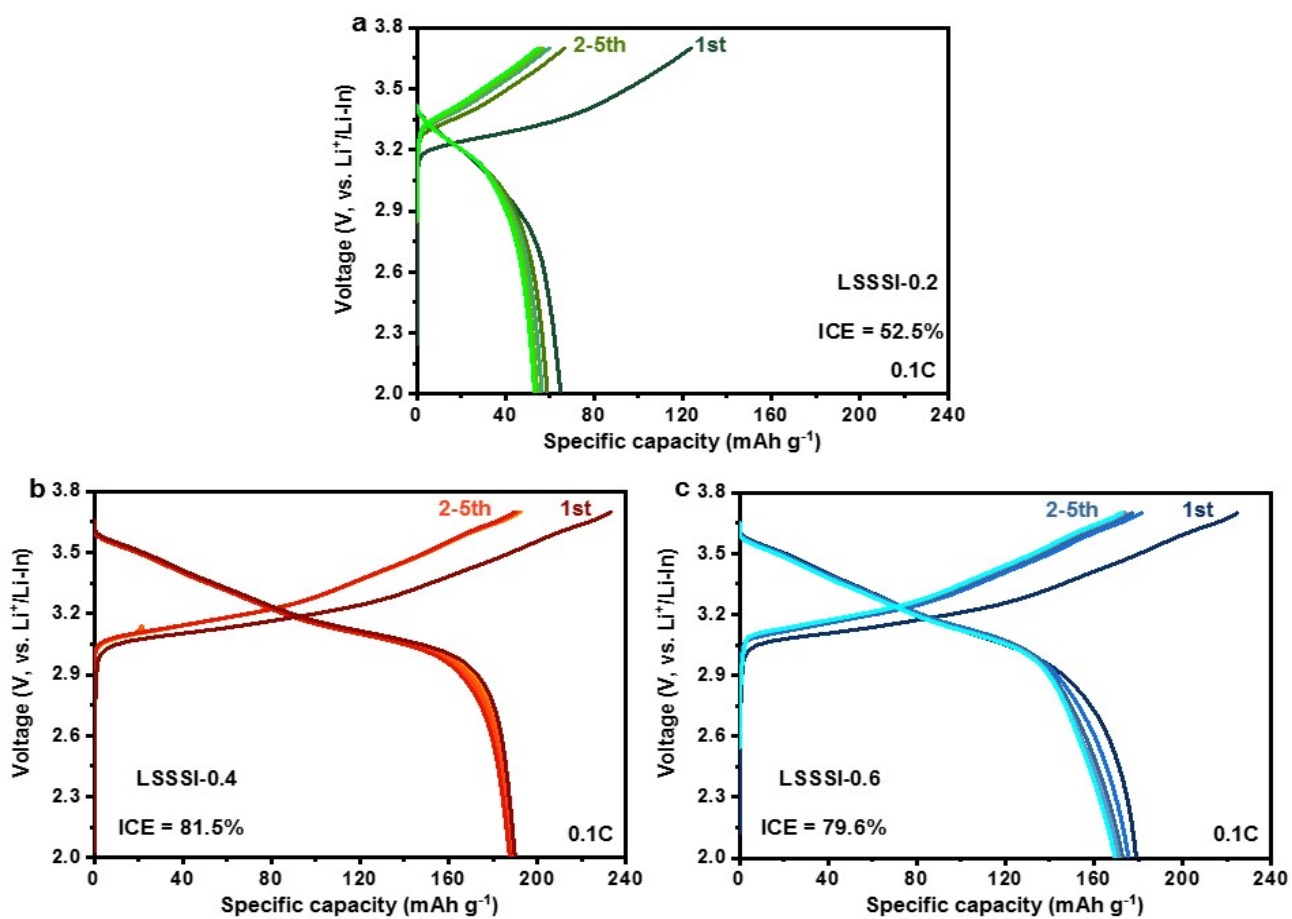

**Fig. S18.** Galvanostatic charge and discharge curves of the optimized ASSLBs using (a) LSSSI-0.2, (b) LSSSI-0.4 and (c) LSSSI-0.6 electrolytes at 0.1C.

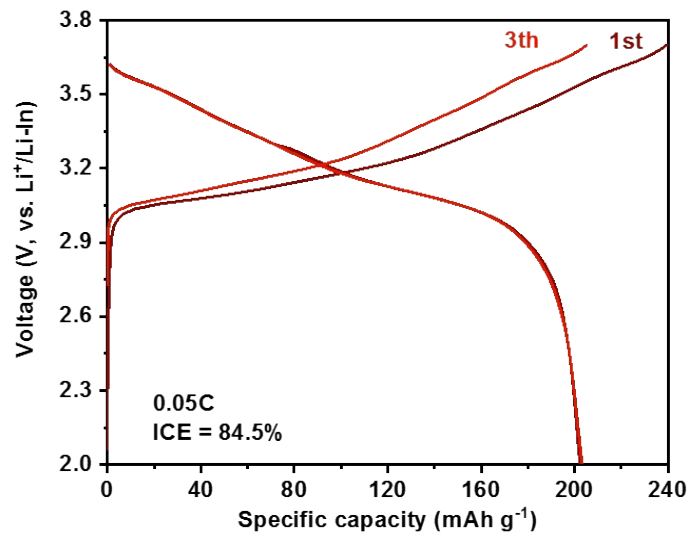

**Fig. S19.** Charge-discharge curves of the optimized ASSLB from 2.0 to 3.7 V (vs. Li<sup>+</sup>/Li-In) at 0.05C.

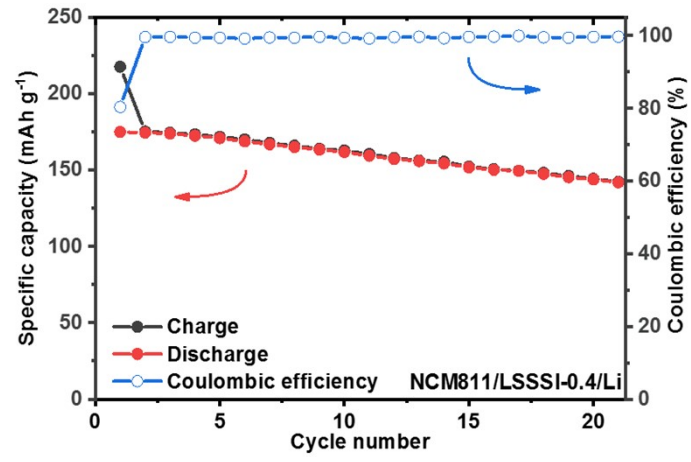

**Fig. S20.** The cycling performance of ASSLMB at 0.05C.

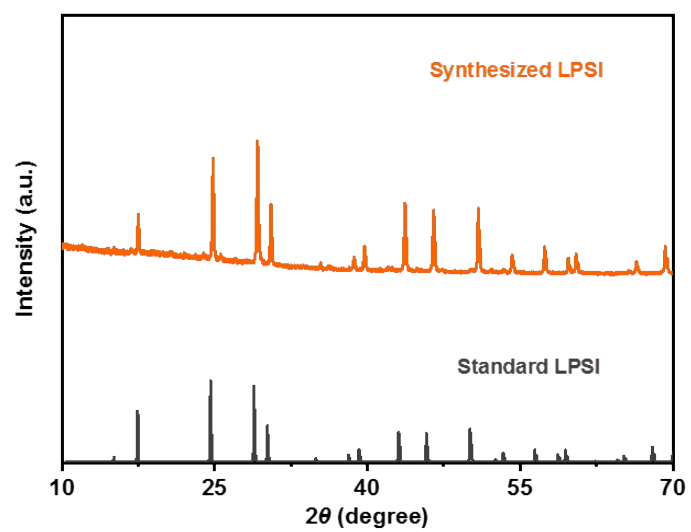

**Fig. S21.** XRD pattern of synthesized LPSI electrolyte.

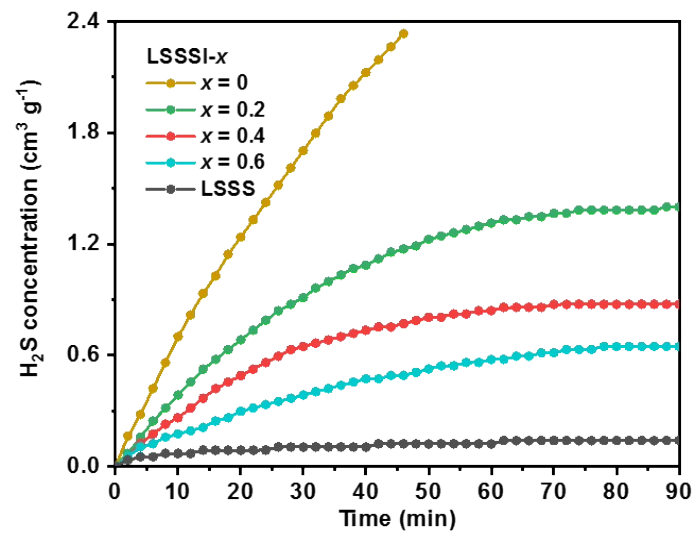

**Fig. S22.** Amount of H<sub>2</sub>S gas generated when LSSSI- $x$  ( $0.0 \leq x \leq 0.6$ ) and LSSS powders were exposed to humid air.



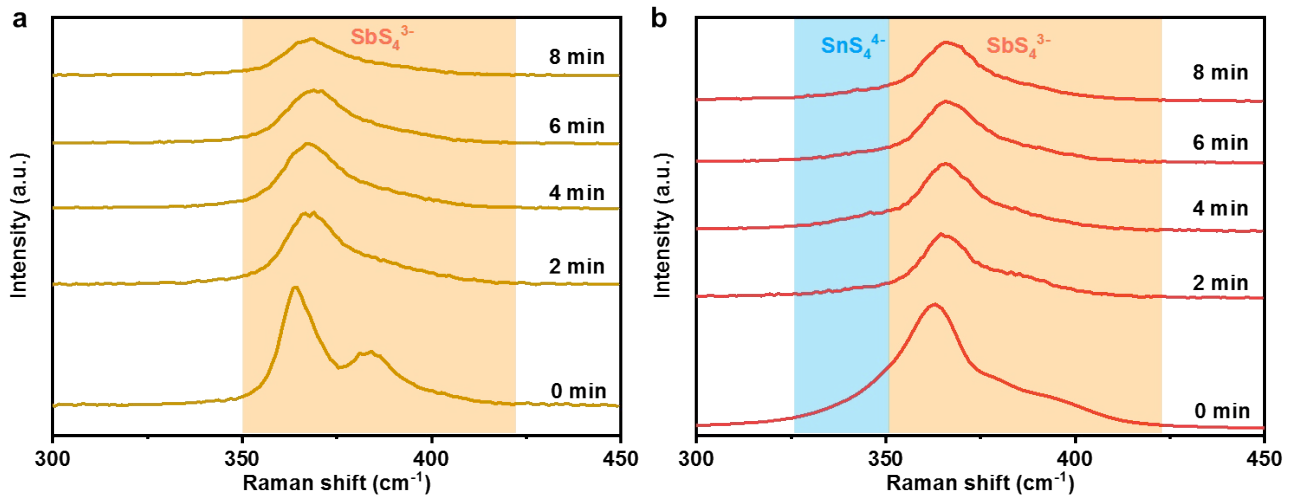

**Fig. S23.** In-situ Raman spectra of (a) LSSSI-0 and (b) LSSSI-0.4 after exposure to humid air (~71% RH, 26 °C).

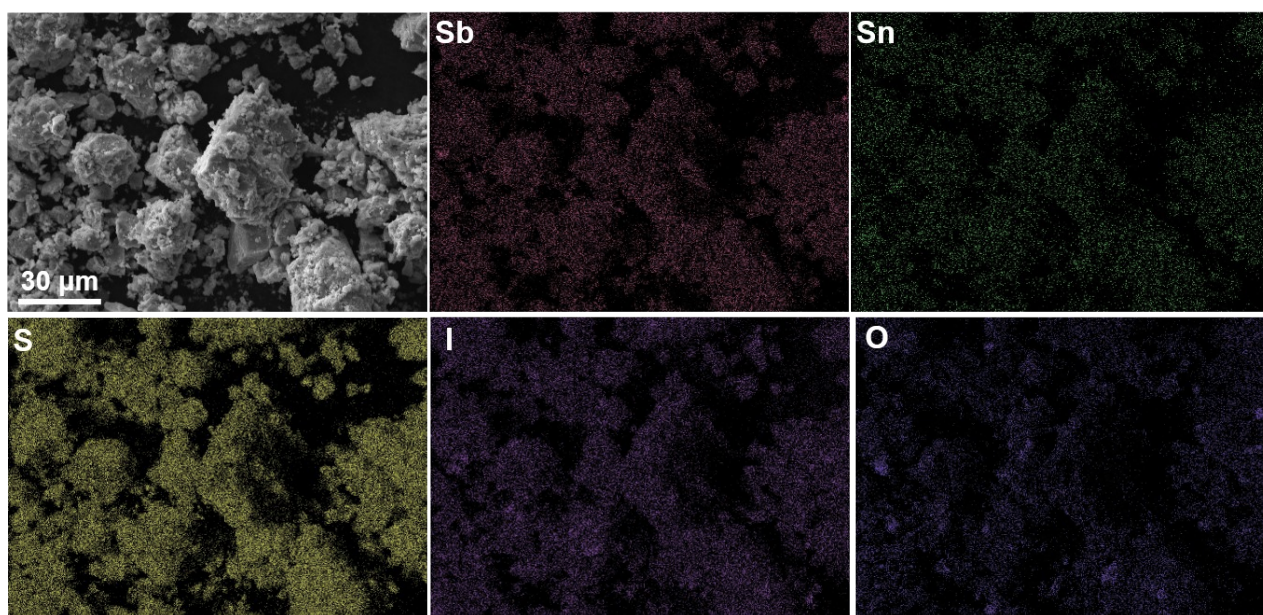

**Fig. S24.** SEM and corresponding EDS elemental mapping images of dried LSSSI-0.4 electrolyte.

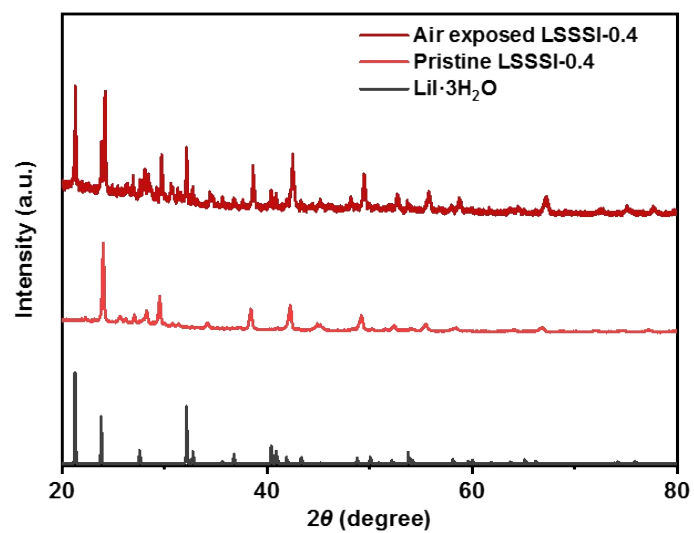

**Fig. S25.** XRD patterns of the as-synthesized LSSSI-0.4 and air exposed LSSSI-0.4 electrolytes.

**Table S1.** XRD Rietveld refinement results of LSSSI-0 with space group  $F4m$ .

---

$a = 10.43676\text{\AA}$ ,  $R_p = 4.89\%$ ,  $R_{wp} = 6.87\%$

---

| Atom | Wyckoff site | x       | y       | z       | Occupancy |
|------|--------------|---------|---------|---------|-----------|
| Sb1  | 4b           | 0.5     | 0.5     | 0.5     | 1         |
| S1   | 4c           | 0.25    | 0.25    | 0.25    | 1         |
| S2   | 16e          | 0.37253 | 0.37253 | 0.62777 | 1         |
| I1   | 4a           | 0.5     | 0.5     | 0       | 1         |
| Li1  | 48h          | 0.28167 | 0.53204 | 0.78237 | 0.5       |

---

**Table S2.** XRD Rietveld refinement results of LSSSI-0.2 with space group  $F4m$ .

---

$a = 10.45685\text{\AA}$ ;  $R_p = 5.23\%$ ;  $R_{wp} = 6.88\%$ ; 5.28 wt% LSS, 2.24 wt%  $\text{Li}_2\text{S}$

---

| Atom | Wyckoff site | x       | y       | z       | Occupancy |
|------|--------------|---------|---------|---------|-----------|
| Sb1  | 4b           | 0.5     | 0.5     | 0.5     | 0.808     |
| Sn1  | 4b           | 0.5     | 0.5     | 0.5     | 0.192     |
| S1   | 4c           | 0.25    | 0.25    | 0.25    | 0.952     |
| S2   | 16e          | 0.37203 | 0.37203 | 0.62866 | 1         |
| I1   | 4a           | 0.5     | 0.5     | 0       | 1         |
| I2   | 4c           | 0.25    | 0.25    | 0.25    | 0.048     |
| Li1  | 48h          | 0.28322 | 0.53192 | 0.78022 | 0.516     |

---

**Table S3.** XRD Rietveld refinement results of LSSSI-0.4 with space group  $F4m$ .

---

$a = 10.46601\text{\AA}$ ;  $R_p = 5.55\%$ ;  $R_{wp} = 7.46\%$ ; 17.06 wt% LSS, 4.35 wt%  $\text{Li}_2\text{S}$ , 0.73 wt% LiI

---

| Atom | Wyckoff site | x       | y       | z       | Occupancy |
|------|--------------|---------|---------|---------|-----------|
| Sb1  | 4b           | 0.5     | 0.5     | 0.5     | 0.616     |
| Sn1  | 4b           | 0.5     | 0.5     | 0.5     | 0.384     |
| S1   | 4c           | 0.25    | 0.25    | 0.25    | 0.952     |
| S2   | 16e          | 0.37169 | 0.37169 | 0.62915 | 1         |
| I1   | 4a           | 0.5     | 0.5     | 0       | 1         |
| I2   | 4c           | 0.25    | 0.25    | 0.25    | 0.048     |
| Li1  | 48h          | 0.28480 | 0.53280 | 0.79200 | 0.533     |

---

**Table S4.** XRD Rietveld refinement results of LSSSI-0.6 with space group  $F4m$ .

---

$a = 10.48021\text{\AA}$ ;  $R_p = 6.18\%$ ;  $R_{wp} = 8.37\%$ ; 36.30 wt% LSS, 7.38 wt%  $\text{Li}_2\text{S}$ , 3.04 wt% LiI, 0.09 wt%

---

| $\text{Sn}_4\text{SI}_6$ |              |         |         |         |           |
|--------------------------|--------------|---------|---------|---------|-----------|
| Atom                     | Wyckoff site | x       | y       | z       | Occupancy |
| Sb1                      | 4b           | 0.5     | 0.5     | 0.5     | 0.432     |
| Sn1                      | 4b           | 0.5     | 0.5     | 0.5     | 0.568     |
| S1                       | 4c           | 0.25    | 0.25    | 0.25    | 0.952     |
| S2                       | 16e          | 0.37057 | 0.37057 | 0.63036 | 1         |
| I1                       | 4a           | 0.5     | 0.5     | 0       | 1         |
| I2                       | 4c           | 0.25    | 0.25    | 0.25    | 0.048     |
| Li1                      | 48h          | 0.28631 | 0.53378 | 0.77723 | 0.550     |

---

**Table S5.** Ionic conductivities and activation energies of sulfide solid state electrolytes.

| Composition                                                                                                                                      | Conductivity [S cm <sup>-1</sup> ] | $E_a$ [eV] | Ref.      |
|--------------------------------------------------------------------------------------------------------------------------------------------------|------------------------------------|------------|-----------|
| Li <sub>9.54</sub> Si <sub>1.74</sub> P <sub>1.44</sub> S <sub>11.7</sub> Cl <sub>0.3</sub>                                                      | $2.5 \times 10^{-2}$               | 0.24       | [6]       |
| Li <sub>9.54</sub> [Si <sub>0.6</sub> Ge <sub>0.4</sub> ] <sub>1.74</sub> P <sub>1.44</sub> S <sub>11.1</sub> Br <sub>0.3</sub> O <sub>0.6</sub> | $3.2 \times 10^{-2}$               | 0.24       | [7]       |
| Li <sub>6</sub> PS <sub>5</sub> I                                                                                                                | $2.8 \times 10^{-6}$               | 0.42       | [8]       |
| Li <sub>6.2</sub> Sn <sub>0.2</sub> P <sub>0.8</sub> S <sub>5</sub> I                                                                            | $3.5 \times 10^{-4}$               | 0.30       | [8]       |
| Li <sub>6</sub> PS <sub>5</sub> Cl                                                                                                               | $2.4 \times 10^{-3}$               | 0.32       | [9]       |
| Li <sub>4</sub> SnS <sub>4</sub>                                                                                                                 | $7.0 \times 10^{-5}$               | 0.41       | [10]      |
| Li <sub>3.875</sub> Sn <sub>0.875</sub> As <sub>0.125</sub> S <sub>4</sub>                                                                       | $1.5 \times 10^{-3}$               | 0.27       | [11]      |
| Li <sub>3.85</sub> Sn <sub>0.85</sub> Sb <sub>0.15</sub> S <sub>4</sub>                                                                          | $4.6 \times 10^{-4}$               | 0.50       | [12]      |
| Li <sub>6</sub> SbS <sub>5</sub> I                                                                                                               | $3.0 \times 10^{-6}$               | 0.38       | [3]       |
| Li <sub>6.5</sub> Ge <sub>0.5</sub> Sb <sub>0.5</sub> S <sub>5</sub> I                                                                           | $1.61 \times 10^{-2}$              | 0.18       | [3]       |
| Li <sub>6.7</sub> Si <sub>0.7</sub> Sb <sub>0.3</sub> S <sub>5</sub> I                                                                           | $1.12 \times 10^{-2}$              | 0.26       | [13]      |
| LSSSI-0.4                                                                                                                                        | $3.49 \times 10^{-4}$              | 0.31       | This work |



**Table S6.** The comparison of electrochemical properties of this work with other published ASSLBs based on air-exposed SSEs.

| Assembled batteries                                                                                                                                  | Voltage<br>(V vs.<br>Li/Li <sup>+</sup> ) | Loading<br>mass<br>(mg cm <sup>-2</sup> ) | Initial discharge<br>capacity (mAh g <sup>-1</sup> ) | Cycle<br>life | Reference |
|------------------------------------------------------------------------------------------------------------------------------------------------------|-------------------------------------------|-------------------------------------------|------------------------------------------------------|---------------|-----------|
| NCM811/LSSSI-0.4/Li-In                                                                                                                               | 2.6~4.3                                   | 8.92                                      | 184.0<br>(0.1C, 30 °C)<br>131.7<br>(0.2C, 30 °C)     | >600          | This work |
| 0.4LiI-0.6Li <sub>4</sub> SnS <sub>4</sub> @LiCoO <sub>2</sub> /Li <sub>3</sub> PS <sub>4</sub> /Li-In                                               | 3.0~4.3                                   | 16.23                                     | ~118<br>(0.1C, 30 °C)                                | -             | [14]      |
| Li <sub>4</sub> SnS <sub>4</sub> @LiCoO <sub>2</sub> /Li <sub>10</sub> GeP <sub>2</sub> S <sub>12</sub> /Li <sub>3</sub> PS <sub>4</sub> /Li-In      | 3.0~4.3                                   | 16.23                                     | ~110<br>(0.1C, 30 °C)                                | 30            | [15]      |
| LiCoO <sub>2</sub> /Li <sub>10</sub> Ge(P <sub>0.925</sub> Sb <sub>0.075</sub> ) <sub>2</sub> S <sub>12</sub> /In                                    | 2.5~4.2                                   | 8.92                                      | 126.0<br>(0.1C, RT)                                  | >50           | [16]      |
| LiCoO <sub>2</sub> /Li <sub>3.875</sub> Sn <sub>0.875</sub> As <sub>0.125</sub> S <sub>4</sub> /Li <sub>4</sub> Ti <sub>5</sub> O <sub>12</sub>      | 0.6~3.2                                   | 1.27                                      | 188.4<br>(0.1C, 30 °C)                               | 210           | [11]      |
| NCM811/Li <sub>9.54</sub> Si <sub>1.74</sub> (P <sub>9.903</sub> Sb <sub>0.097</sub> ) <sub>2</sub> S <sub>11.7</sub> Cl <sub>0.3</sub> /graphite/Li | 2.5~4.3                                   | 2.0                                       | 182.4<br>(0.5C, 55 °C)                               | 30            | [17]      |
| NCM622/Li <sub>6.04</sub> P <sub>0.98</sub> Bi <sub>0.02</sub> S <sub>4.97</sub> O <sub>0.03</sub> Cl/Li                                             | 2.5~4.3                                   | 8.79                                      | ~120.0<br>(0.2C, RT)                                 | 40            | [18]      |

where RT stands for room temperature.

---

**References:**

- 1 T. J. Whittles, T. D. Veal, C. N. Savory, A. W. Welch, J. T. Gibbon, M. Birkett, R. J. Potter, D. O. Scanlon, A. Zakutayev and V. R. Dhanak, *ACS Appl. Mater. Interfaces*, 2017, **9**, 41916.
- 2 N. Fleck, O. S. Hutter, L. J. Phillips, H. Shiel, T. D. Hobson, V. R. Dhanak, T. D. Veal, F. Jäckel, K. Durose and J. D. Major, *ACS Appl. Mater. Interfaces*, 2020, **12**, 52595.
- 3 Y. Lee, J. Jeong, H. J. Lee, M. Kim, D. Han, H. Kim, J. M. Yuk, K.-W. Nam, K. Y. Chung, H.-G. Jung and S. Yu, *ACS Energy Lett.*, 2022, **7**, 171.
- 4 M. B. Preefer, J. H. Grebenkemper, F. Schroeder, J. D. Bocarsly, K. Pilar, J. A. Cooley, W. Zhang, J. Hu, S. Misra, F. Seeler, K. Schierle-Arndt and R. Seshadri, *ACS Appl. Mater. Interfaces*, 2019, **11**, 42280.
- 5 G. Liu, D. Xie, X. Wang, X. Yao, S. Chen, R. Xiao, H. Li and X. Xu, *Energy Storage Mater.*, 2019, **17**, 266.
- 6 Y. Kato, S. Hori, T. Saito, K. Suzuki, M. Hirayama, A. Mitsui, M. Yonemura, H. Iba and R. Kanno, *Nat. Energy*, 2016, **1**, 16030.
- 7 Y. Li, S. Song, H. Kim, K. Nomoto, H. Kim, X. Sun, S. Hori, K. Suzuki, N. Matsui, M. Hirayama, T. Mizoguchi, T. Saito, T. Kamiyama and R. Kanno, *Science*, 2023, **381**, 50.
- 8 F. Zhao, J. Liang, C. Yu, Q. Sun, X. Li, K. Adair, C. Wang, Y. Zhao, S. Zhang, W. Li, S. Deng, R. Li, Y. Huang, H. Huang, L. Zhang, S. Zhao, S. Lu and X. Sun, *Adv. Energy Mater.*, 2020, **10**, 1903422.
- 9 H. Liu, Q. Zhu, Y. Liang, C. Wang, D. Li, X. Zhao, L. Gao and L.-Z. Fan, *Chem. Eng. J.*, 2023, **462**, 142183.
- 10 T. Kaib, S. Haddapour, M. Kapitein, P. Bron, C. Schröder, H. Eckert, B. Roling and S. Dehnen, *Chem. Mater.*, 2012, **24**, 2211.
- 11 P. Lu, L. Liu, S. Wang, J. Xu, J. Peng, W. Yan, Q. Wang, H. Li, L. Chen and F. Wu, *Adv. Mater.*, 2021, **33**, 2100921.
- 12 H. Kwak, K. H. Park, D. Han, K.-W. Nam, H. Kim and Y. S. Jung, *J. Power Sources*, 2020,

---

446, 227338.

13 L. Zhou, A. Assoud, Q. Zhang, X. Wu and L. F. Nazar, *J. Am. Chem. Soc.*, 2019, **141**, 19002.

14 K. H. Park, D. Y. Oh, Y. E. Choi, Y. J. Nam, L. Han, J.-Y. Kim, H. Xin, F. Lin, S. M. Oh and Y. S. Jung, *Adv. Mater.*, 2016, **18**, 1874.

15 Y. E. Choi, K. H. Park, D. H. Kim, D. Y. Oh, H. R. Kwak, Y.-G. Lee and Y. S. Jung, *ChemSusChem*, 2017, **10**, 2605.

16 J. Liang, N. Chen, X. Li, X. Li, K. R. Adair, J. Li, C. Wang, C. Yu, M. N. Banis, L. Zhang, S. Zhao, S. Lu, H. Huang, R. Li, Y. Huang and X. Sun, *Chem. Mater.*, 2020, **32**, 2664.

17 L. Ye, E. Gil-González and X. Li, *Electrochem. Commun.*, 2021, **128**, 107058.

18 H. Liu, Q. Zhu, C. Wang, G. Wang, Y. Liang, D. Li, L. Gao and L.-Z. Fan, *Adv. Funct. Mater.*, 2022, **32**, 2203858.
